# Supplementary material for: First Characterization and Regulatory Function of piRNAs in the Apis mellifera Larval Response to Ascosphaera apis Invasion
Source: MDPI journal article supplement (doi:10.3390/ijms242216358), 2023-11-15
Supplement: s1 [file s1]

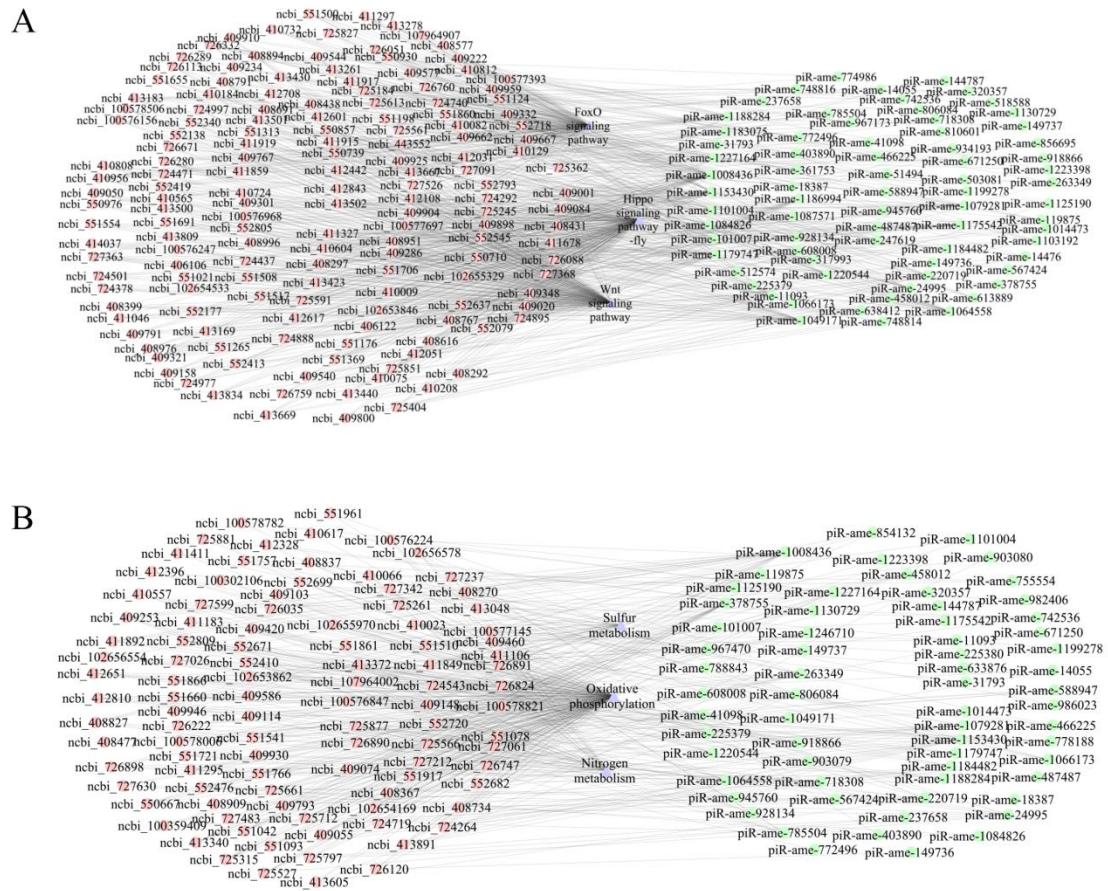

**Figure S2.** Development pathway-associated regulatory network (A) and energy metabolism pathway-associated regulatory network (B) between DEpiRNAs and target mRNAs in the 4-, 5-, and 6-day-old comparison groups. Pink and green circles respectively indicate target mRNAs and DEpiRNAs, while purple triangles indicate immune pathways.
