# Supplementary material for: First Characterization and Regulatory Function of piRNAs in the Apis mellifera Larval Response to Ascosphaera apis Invasion
Source: MDPI journal article supplement (doi:10.3390/ijms242216358), 2023-11-15
Supplement: s1 [file s1]

A

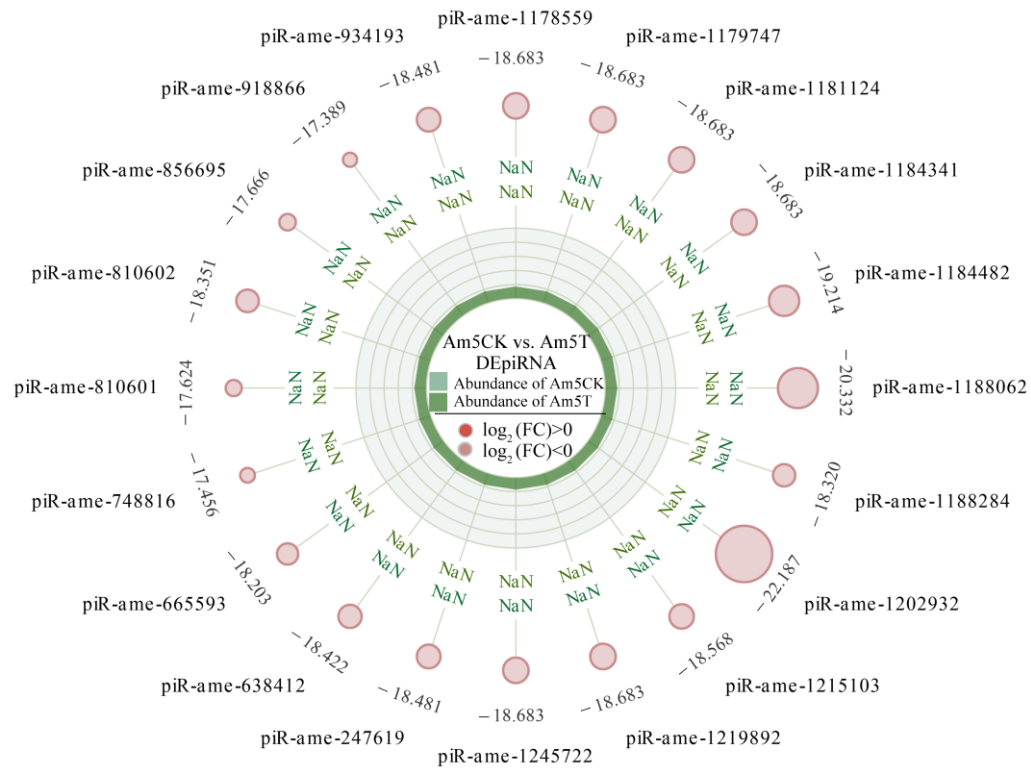

B

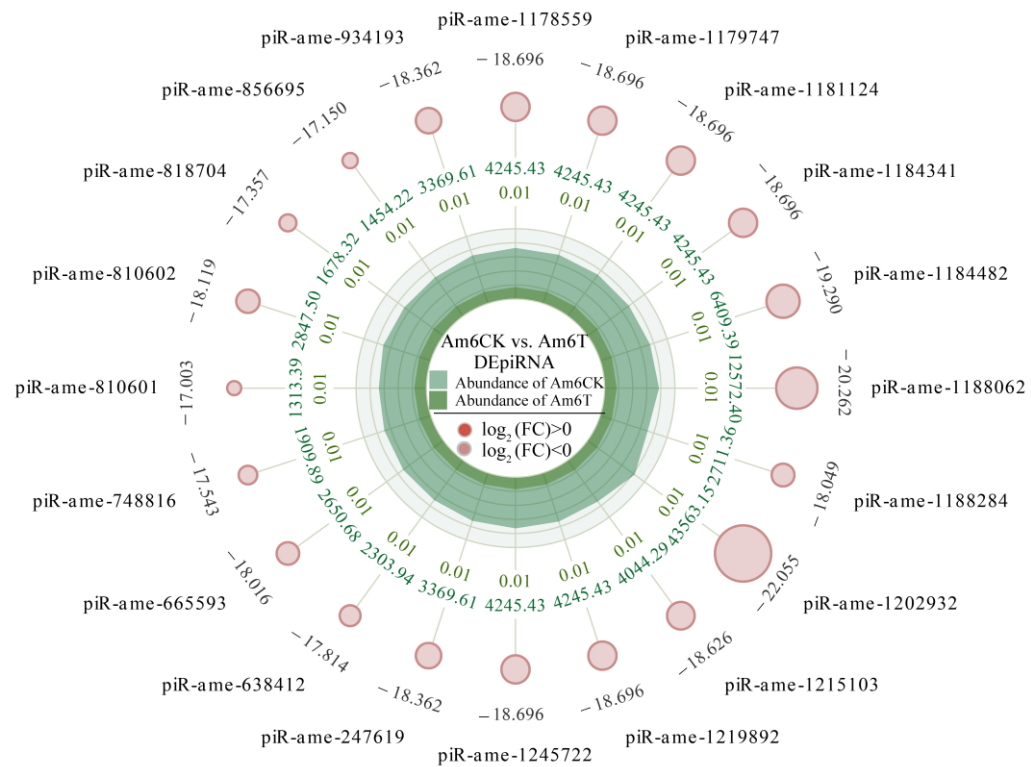

**Figure S1.** Radar map of the top 20 DEpiRNAs in the Am5CK vs. Am5T (A) and Am6CK vs. Am6T (B) comparison group, green circles indicate down-regulated piRNAs, and the size of each circle indicates the numerical value of  $\log_2(FC)$ ; data outside the circles indicate the average expression of piRNAs in the Am5CK or Am6CK group; and inner-circle data represent the average expression of sample Am5T or Am6T; the light and deep green colors at the center respectively indicate the expression abundance of

Am5CK or Am6CK and Am5T or Am6T on each axis.
